# Supplementary material for: Assessment of Fibrinogen-like 2 (FGL2) in Human Chronic Kidney Disease through Transcriptomics Data Analysis
Source: MDPI journal article supplement (doi:10.3390/biom13010089), 2022-12-31
Supplement: s1 [file s1]

## SUPPLEMENTARY MATERIAL

### TABLE OF CONTENT

|                                                                                                                     |   |
|---------------------------------------------------------------------------------------------------------------------|---|
| Supplementary Figure S1 – Association of FGL2 expression with baseline parameters in the Innsbruck CKD cohort ..... | 2 |
| Supplementary Figure S2 – Association of FGL2 expression with baseline parameters in the NEPTUNE cohort .....       | 3 |
| Supplementary Table S1 – List of primary antibodies used in immunostaining experiments .....                        | 4 |
| Supplementary Table S2 – List of secondary antibodies used in immunostaining experiments.....                       | 5 |
| Supplementary Table S3 – Baseline characteristics of KPMP participants included in scRNASeq analysis. ....          | 6 |
| Supplementary Table S4 – Analyses of FGL2 expression in transcriptomics datasets available through NephroSeq .....  | 7 |
| Supplementary Data S1 – Members of the Nephrotic Syndrome Study Network (NEPTUNE) .....                             | 9 |

### Supplementary Figure S1 – Association of FGL2 expression with baseline parameters in the Innsbruck CKD cohort

FGL2 expression is significantly associated with tubular atrophy (*Panel A*) but not with the degree of glomerulosclerosis (*Panel B*) and proteinuria (*Panel C*).

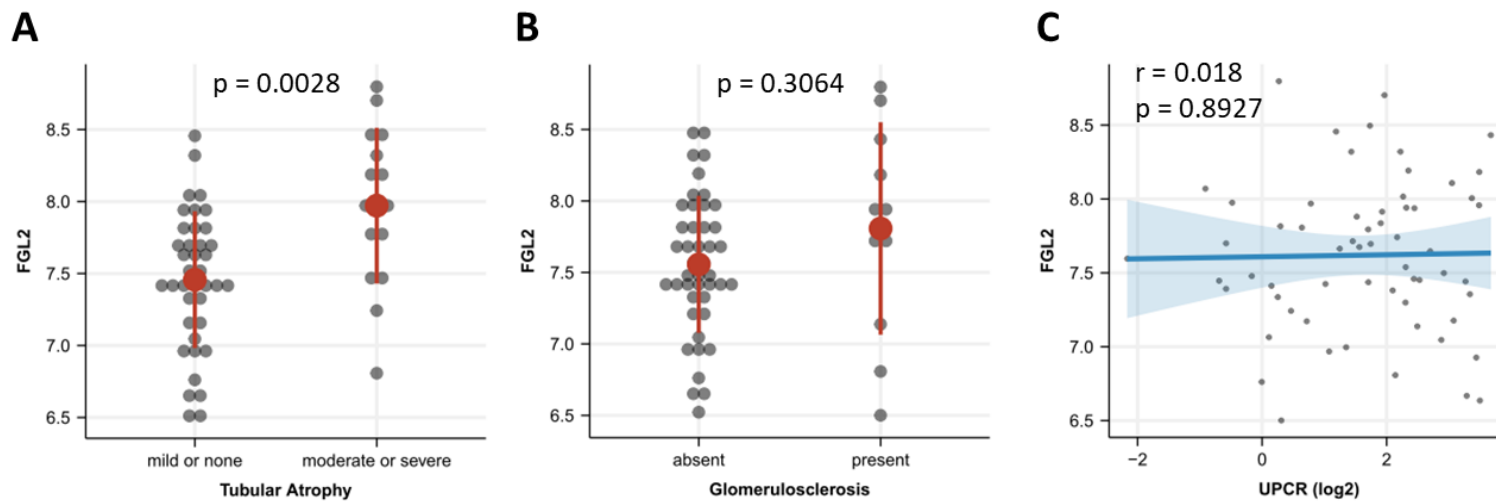

**Supplementary Figure S2 – Association of FGL2 expression with baseline parameters in the NEPTUNE cohort**

FGL2 expression is significantly associated with tubular atrophy (*Panel A*) but not with baseline proteinuria (*Panel B*)

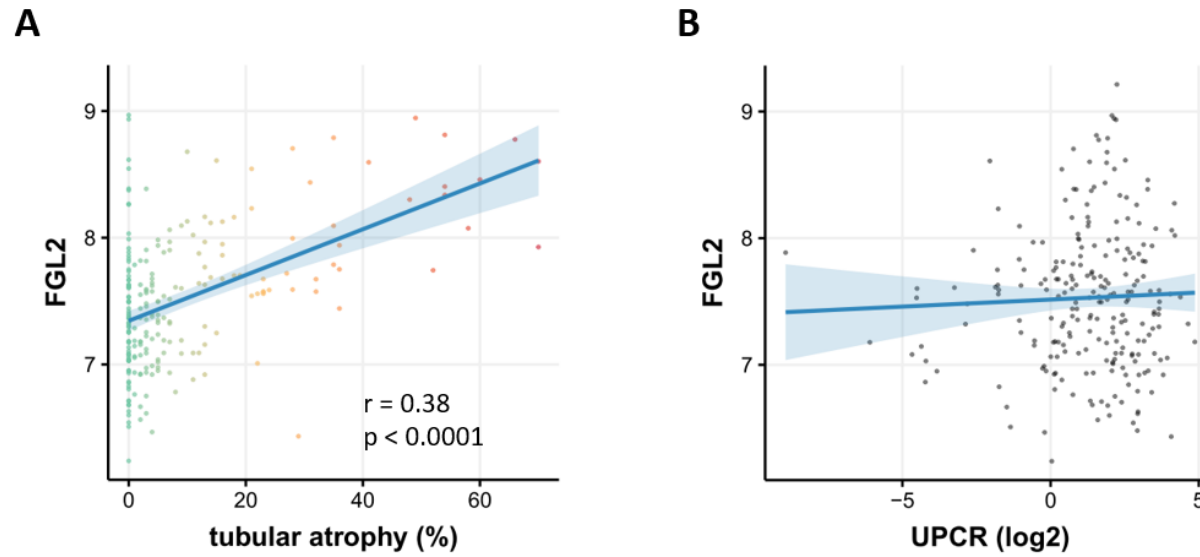

**Supplementary Table S1 – List of primary antibodies used in immunostaining experiments**

| <b>Protein</b> | <b>Reactivity</b> | <b>Source</b> | <b>Ig-Class</b> | <b>Company</b>      | <b>Order number</b> | <b>Dilution</b> |
|----------------|-------------------|---------------|-----------------|---------------------|---------------------|-----------------|
| FGL2           | Human             | Mouse         | monoclonal      | Abnova              | H00010875-M01       | 1:1000          |
| AQP2           | Human             | Rabbit        | polyclonal      | Sigma-Aldrich/Merck | HPA046834           | 1:1000          |
| PODXL          | Human             | Rabbit        | polyclonal      | Sigma-Aldrich/Merck | HPA045507           | 1:1000          |
| UMOD           | Human             | Rabbit        | polyclonal      | Sigma-Aldrich/Merck | HPA043420           | 1:1000          |

**Supplementary Table S2 – List of secondary antibodies used in immunostaining experiments**

| <b>Label</b>     | <b>Source</b> | <b>directed against</b> | <b>Ig-Class</b> | <b>Company</b> | <b>Cat.No.</b> | <b>Dilution</b> |
|------------------|---------------|-------------------------|-----------------|----------------|----------------|-----------------|
| Alexa Fluor+ 555 | Donkey        | Anti-Rabbit             | IgG             | Thermo Fisher  | A32794         | 1:2000          |
| Alexa Fluor+ 647 | Donkey        | anti-Mouse              | IgG             | Thermo Fisher  | A32787         | 1:2000          |

**Supplementary Table S3 – Baseline characteristics of KPMP participants included in scRNASeq analysis.**

| Sample | Gender | Age | Race                      | Baseline eGFR<br>(ml/min/1.73m2) | Proteinuria<br>(mg) | A1c<br>(%) | Albuminuria<br>(mg) | Diabetes<br>History | Diabetes<br>Duration | Hypertension<br>History | Hypertension<br>Duration | On<br>RAAS<br>Blockade |
|--------|--------|-----|---------------------------|----------------------------------|---------------------|------------|---------------------|---------------------|----------------------|-------------------------|--------------------------|------------------------|
| S1     | Female | 62  | White                     | 40-49                            |                     | > 8.5      | 500-999mg           | Yes                 | 30-34                | Yes                     | 30-34                    | Yes                    |
| S2     | Male   | 64  | White                     | 30-39                            | < 150mg             | > 8.5      | < 30mg              | Yes                 | 0-4                  | No                      |                          | No                     |
| S3     | Female | 66  | Black or African-American | 80-89                            | 500-999mg           |            | 500-999mg           | Yes                 | 5-9                  | Yes                     | 30-34                    | Yes                    |
| S4     | Male   | 71  |                           | 40-49                            |                     |            |                     | Yes                 | 10-14                | Yes                     | 0-4                      | No                     |
| S5     | Female | 34  | White                     | 30-39                            | >= 1000mg           | 6.5-7.49   |                     | Yes                 | 20-24                | Yes                     | 5-9                      | Yes                    |
| S6     | Female | 63  | Black or African-American | 110-119                          | < 150mg             | 6.5-7.49   | 30-299mg            | Yes                 | 5-9                  | Yes                     | 20-24                    | Yes                    |
| S7     | Female | 33  | White                     | 100-109                          | 500-999mg           |            | 500-999mg           | Yes                 | 20-24                | Yes                     | 0-4                      | Yes                    |
| S8     | Male   | 74  | White                     | 40-49                            | 150mg-499mg         | 6.5-7.49   | < 30mg              | Yes                 | 25-29                | Yes                     | 25-29                    | Yes                    |
| S9     | Female | 77  | White                     | 60-69                            | >= 1000mg           | 6.5-7.49   | >= 1000mg           | Yes                 | 10-14                | Yes                     | 10-14                    | Yes                    |
| S10    | Female | 67  | White,Other               | 20-29                            | >= 1000mg           | < 6.5      | >= 1000mg           | Yes                 | 20-24                | Yes                     | 0-4                      | No                     |

**Supplementary Table S4 – Analyses of FGL2 expression in transcriptomics datasets available through NephroSeq**

| Dataset                        | Analysis                                                    | Analysis Synopsis   | Analysis Type   | p-Value  | Fold Change | Data Type | Reporter             |
|--------------------------------|-------------------------------------------------------------|---------------------|-----------------|----------|-------------|-----------|----------------------|
| Berthier Lupus Glom            | Lupus Nephritis vs. Healthy Living Donor                    | Disease vs. Control | over expression | < 0.0001 | 3.18        | mRNA      | 204834_at            |
| Berthier Lupus TubInt          | Lupus Nephritis vs. Healthy Living Donor                    | Disease vs. Control | over expression | < 0.0001 | 2.08        | mRNA      | 204834_at            |
| ERCB Lupus Glom                | Minimal Change Disease vs. Healthy Living Donor             | Disease vs. Control | over expression | 0.02900  | 1.84        | mRNA      | ENSG00000127951      |
| ERCB Lupus Glom                | Lupus Nephritis vs. Healthy Living Donor                    | Disease vs. Control | over expression | 0.01100  | 1.92        | mRNA      | ENSG00000127951      |
| ERCB Lupus TubInt              | Lupus Nephritis vs. Healthy Living Donor                    | Disease vs. Control | over expression | 0.03300  | 1.80        | mRNA      | ENSG00000127951      |
| ERCB Nephrotic Syndrome TubInt | Diabetic Nephropathy vs. Healthy Living Donor               | Disease vs. Control | over expression | 0.00014  | 2.43        | mRNA      | ENSG00000127951      |
| Hodgin FSGS Glom               | Focal Segmental Glomerulosclerosis vs. Normal Kidney        | Disease vs. Control | over expression | 0.26000  | 1.55        | mRNA      | Hs.296276.0.A1_3p_at |
| Hodgin FSGS Glom               | Minimal Change Disease vs. Normal Kidney                    | Disease vs. Control | over expression | 0.07300  | 2.37        | mRNA      | g5730074_3p_at       |
| Ju CKD Glom                    | Focal Segmental Glomerulosclerosis vs. Healthy Living Donor | Disease vs. Control | over expression | < 0.0001 | 1.73        | mRNA      | 10875                |
| Ju CKD Glom                    | Minimal Change Disease vs. Healthy Living Donor             | Disease vs. Control | over expression | 0.00200  | 1.76        | mRNA      | 10875                |
| Ju CKD Glom                    | Vasculitis vs. Healthy Living Donor                         | Disease vs. Control | over expression | < 0.0001 | 1.92        | mRNA      | 10875                |
| Ju CKD Glom                    | IgA Nephropathy vs. Healthy Living Donor                    | Disease vs. Control | over expression | < 0.0001 | 1.97        | mRNA      | 10875                |

|                            |                                                             |                     |                 |          |      |      |             |
|----------------------------|-------------------------------------------------------------|---------------------|-----------------|----------|------|------|-------------|
| Ju CKD Glom                | Diabetic Nephropathy vs. Healthy Living Donor               | Disease vs. Control | over expression | < 0.0001 | 2.04 | mRNA | 10875       |
| Ju CKD Glom                | Arterial Hypertension vs. Healthy Living Donor              | Disease vs. Control | over expression | < 0.0001 | 2.12 | mRNA | 10875       |
| Ju CKD Glom                | Lupus Nephritis vs. Healthy Living Donor                    | Disease vs. Control | over expression | < 0.0001 | 2.35 | mRNA | 10875       |
| Ju CKD TubInt              | Focal Segmental Glomerulosclerosis vs. Healthy Living Donor | Disease vs. Control | over expression | 0.00096  | 1.58 | mRNA | 10875       |
| Ju CKD TubInt              | Lupus Nephritis vs. Healthy Living Donor                    | Disease vs. Control | over expression | < 0.0001 | 1.62 | mRNA | 10875       |
| Ju CKD TubInt              | Diabetic Nephropathy vs. Healthy Living Donor               | Disease vs. Control | over expression | < 0.0001 | 2.17 | mRNA | 10875       |
| Nakagawa CKD Kidney        | Chronic Kidney Disease vs. Normal Kidney (Discovery Set)    | Disease vs. Control | over expression | < 0.0001 | 1.65 | mRNA | A_23_P42969 |
| Nakagawa CKD Kidney        | Chronic Kidney Disease vs. Normal Kidney (Validation Set)   | Disease vs. Control | over expression | 0.00700  | 2.86 | mRNA | A_23_P42969 |
| Neusser Hypertension Glom  | Nephrosclerosis vs. Tumor Nephrectomy                       | Disease vs. Control | over expression | < 0.0001 | 2.17 | mRNA | 204834_at   |
| Reich IgAN Glom            | IgA Nephropathy vs. Healthy Living Donor                    | Disease vs. Control | over expression | < 0.0001 | 2.98 | mRNA | 204834_at   |
| Schmid Diabetes TubInt     | Diabetic Nephropathy vs. Control                            | Disease vs. Control | over expression | 0.00030  | 2.96 | mRNA | 204834_at   |
| Woroniecka Diabetes TubInt | Diabetic Nephropathy vs. Healthy Living Donor               | Disease vs. Control | over expression | 0.00016  | 2.83 | mRNA | 204834_at   |

---

Analyses for FGL2. Applied filters: Fold change: 1.5, Disease vs. Control Analyses, Glomeruli, Other Kidney Part, Tubulointerstitium, Human. Data was extracted on September 19<sup>th</sup> 2019 and updated on September 2<sup>nd</sup> 2021. A p-value < 0.05 was considered statistically significant.



## **Supplementary Data S1 – Members of the Nephrotic Syndrome Study Network (NEPTUNE)**

### ***NEPTUNE Enrolling Centers***

Cleveland Clinic, Cleveland, OH: K Dell\*, J Sedor\*\*, B Martin#

Children's Hospital, Los Angeles, CA: K Lemley\*, S Tang#

Children's Mercy Hospital, Kansas City, MO: T Srivastava\*, K Markus#

Cohen Children's Hospital, New Hyde Park, NY: C Sethna\*, S Vento #

Columbia University, New York, NY: P Canetta\*, A Pradhan#

Emory University, Atlanta, GA: L Greenbaum\*, C Wang\*\*, E Yun#

Harbor-University of California Los Angeles Medical Center: S Adler\*, J LaPage#

John H. Stroger Jr. Hospital of Cook County, Chicago, IL: A Athavale\*, M Itteera

Johns Hopkins Medicine, Baltimore, MD: M Atkinson\*, T Dell#

Mayo Clinic, Rochester, MN: F Fervenza\*, M Hogan\*\*, J Lieske\*#

Montefiore Medical Center, Bronx, NY: F Kaskel\*, M Ross\*, P Flynn#

NIDDK Intramural, Bethesda MD: J Kopp\*

New York University Medical Center, New York, NY: L Malaga-Dieguez\*, O Zhdanova\*\*, B Pace#

Stanford University, Stanford, CA: R Lafayette\*, S Dave#

Temple University, Philadelphia, PA: I Lee\*, S Quinn-Boyle#

University Health Network Toronto: H Reich \*, M Hladunewich\*\*, P Ling#, M Romano#

University of Miami, Miami, FL: A Fornoni\*, C Bidot#

University of Michigan, Ann Arbor, MI: M Kretzler\*, D Gipson\*, A Williams#, C Klida#

University of North Carolina, Chapel Hill, NC: V Derebail\*, K Gibson\*, A Froment#, F Ochoa-Toro#

University of Pennsylvania, Philadelphia, PA: L Holzman\*, K Meyers\*\*, K Kallem#, A Swenson#

University of Texas Southwestern, Dallas, TX: K Sambandam\*, K Aleman#, M Rogers#

University of Washington, Seattle, WA: A Jefferson\*, S Hingorani\*\*, K Tuttle\*\*§, L Manahan #, E Pao#, K Kuykendall K§

Wake Forest University Baptist Health, Winston-Salem, NC: JJ Lin\*, Stefanie Baker#

### *Data Analysis and Coordinating Center*

M Kretzler\*, L Barisoni\*\*, C Gadegbeku\*\*, B Gillespie\*\*, D Gipson\*\*, L Holzman\*\*, L Mariani\*\*, M Sampson\*\*, J Sedor\*\*, J Zee\*\*, G Alter, H Desmond, S Eddy, D Fermin, M Larkina, S Li, S Li, CC Lienczewski, T Mainieri, R Scherr, A Smith, A Szymanski, A Williams.

### *Digital Pathology Committee*

Carmen Avila-Casado (University Health Network, Toronto), Serena Bagnasco (Johns Hopkins University), Joseph Gaut (Washington University in St Louis), Stephen Hewitt (National Cancer Institute), Jeff Hodgins (University of Michigan), Kevin Lemley (Children's Hospital of Los Angeles), Laura Mariani (University of Michigan), Matthew Palmer (University of Pennsylvania), Avi Rosenberg (Johns Hopkins University), Virginie Royal (University of Montreal), David Thomas (University of Miami), Jarcy Zee (University of Pennsylvania) Co-Chairs: Laura Barisoni (Duke University) and Cynthia Nast (Cedar Sinai).

\* Principal Investigator; \*\* Co-investigator; #Study Coordinator

§ Providence Medical Research Center, Spokane, WA
